# Supplementary material for: Vapor phase pH induced fluorescence switching of a dimethylaminostyryl terpyridine derivative in thin films
Source: Royal Society of Chemistry journal article supplement (doi:10.1039/c1nj20754g), 2011-11-23
Supplement: c1nj20754g.pdf [file c1nj20754g.pdf]

## Supplementary Information

### **Vapor phase pH induced fluorescence switching of a dimethylaminostyryl terpyridine derivative in thin films**

Srivathsa Vaidya\* and Russell H. Schmehl

Department of Chemistry, Tulane University, New Orleans, LA 70118

Lifetime data for MNpvpt ligand at different pH's recorded using single photon counting. Shown below is the scatter (dotted line), decay and the fit.

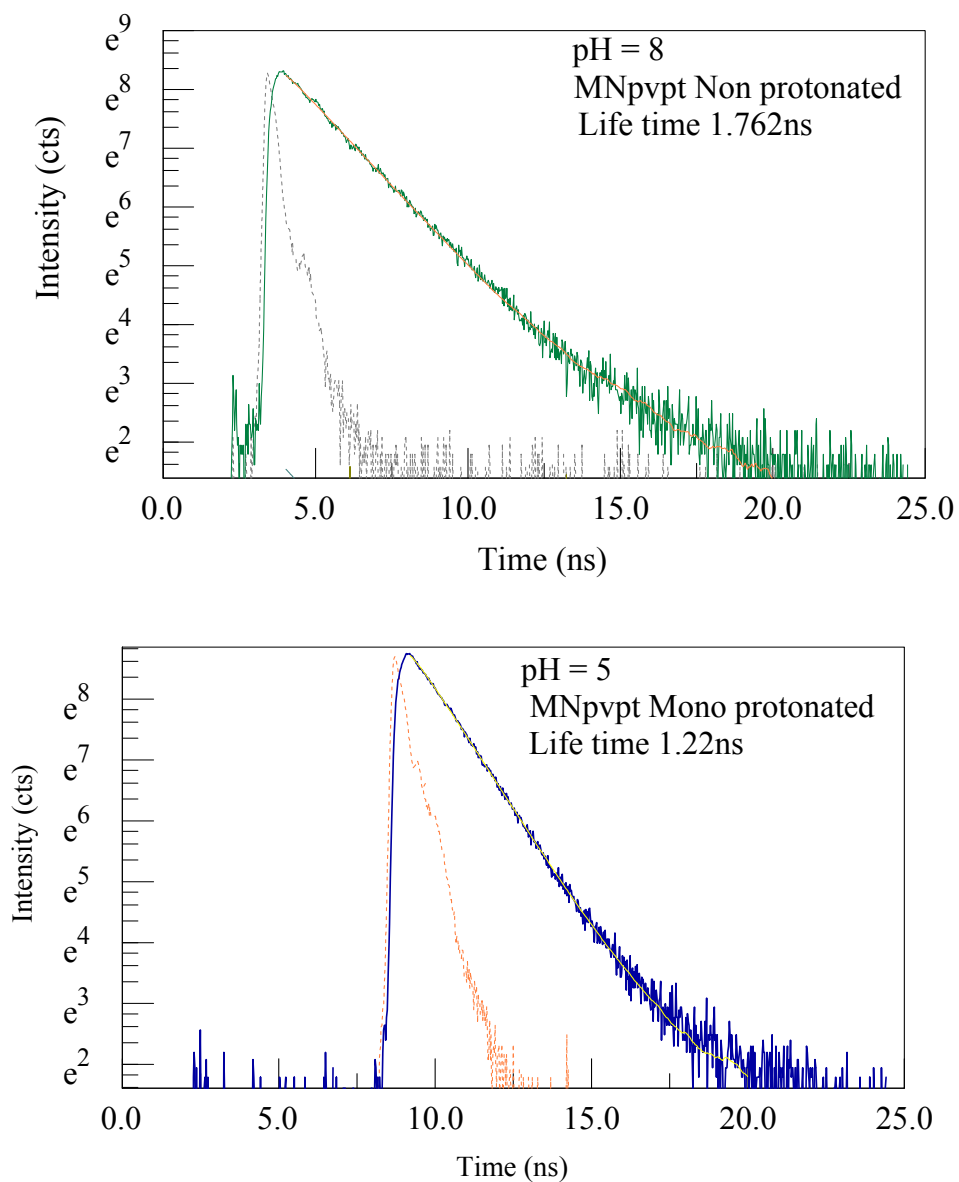

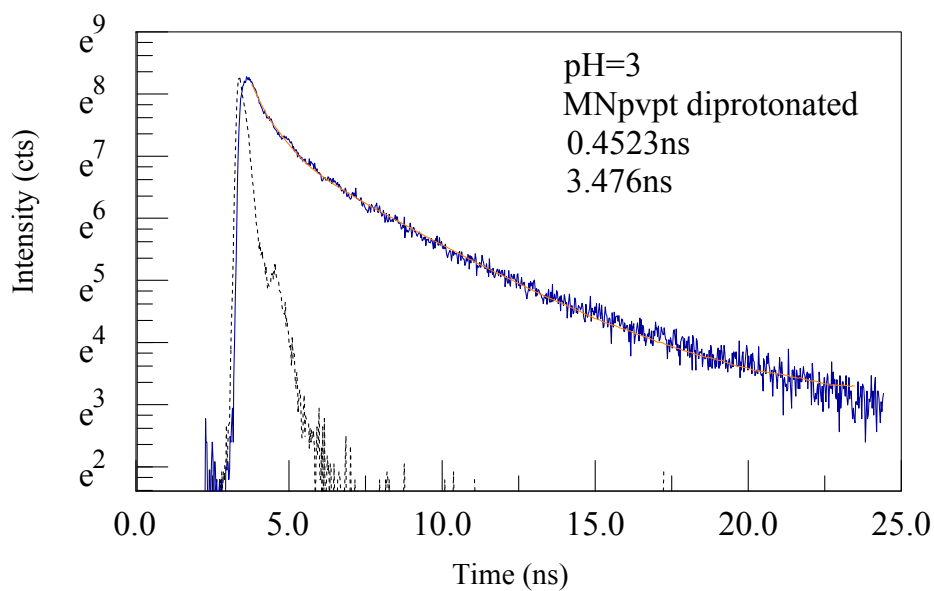

| Life-time | Pre-exponential factor |
|-----------|------------------------|
| 0.4523ns  | 3.77                   |
| 3.476ns   | 0.94                   |

$\text{pH} = \text{pK}_a^* - \log[\tau_{\text{protonated}} / \tau_{\text{deprotonated}}]$  was used to calculate the excited state pK<sub>a</sub> of these molecules..

$\tau_{\text{protonated}}$  – Life-time of protonated form

$\tau_{\text{deprotonated}}$  – Life-time of non-protonated form

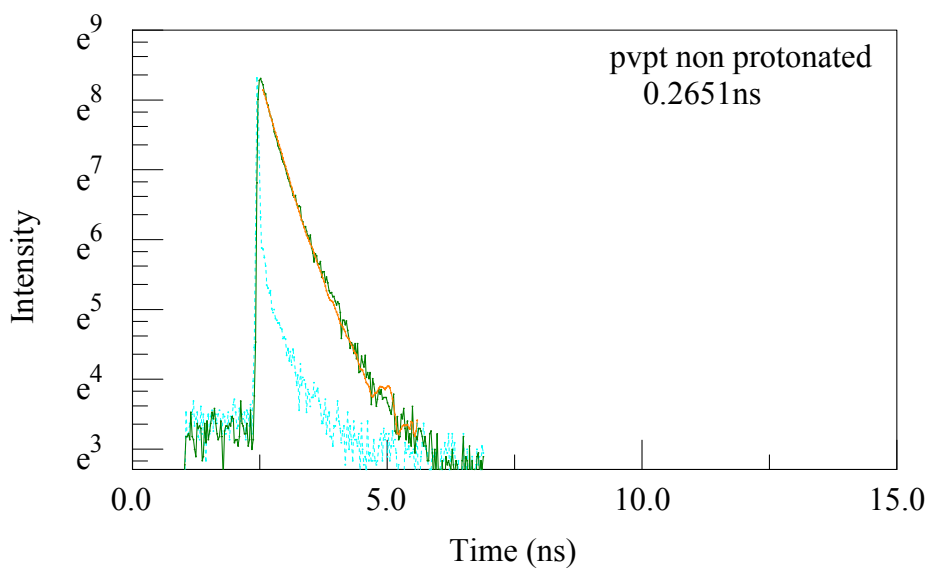

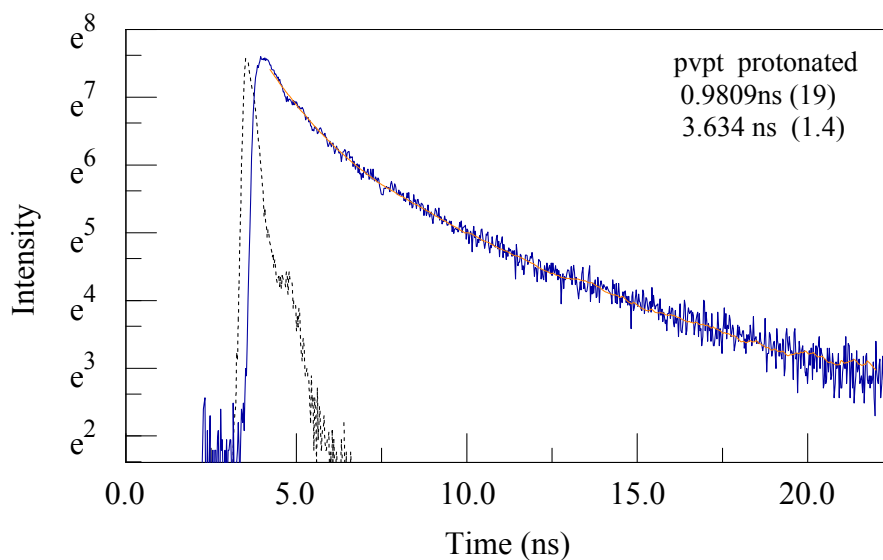

### **DFT calculations and molecular orbitals for MNpvpt (a) and HMNpvpt (b)**

B3LYP TD-DFT calculations were employed for the molecules MNpvpt and mono-protonated MNpvpt (HMNpvpt- protonation of the dimethylamino nitrogen) using the Gaussian 03 (ref. below) software package employing the basis set (6-31G\*). The geometry was fully optimized before setting up the calculations for singlet excited state molecular orbitals.

(a) **MNpvpt**

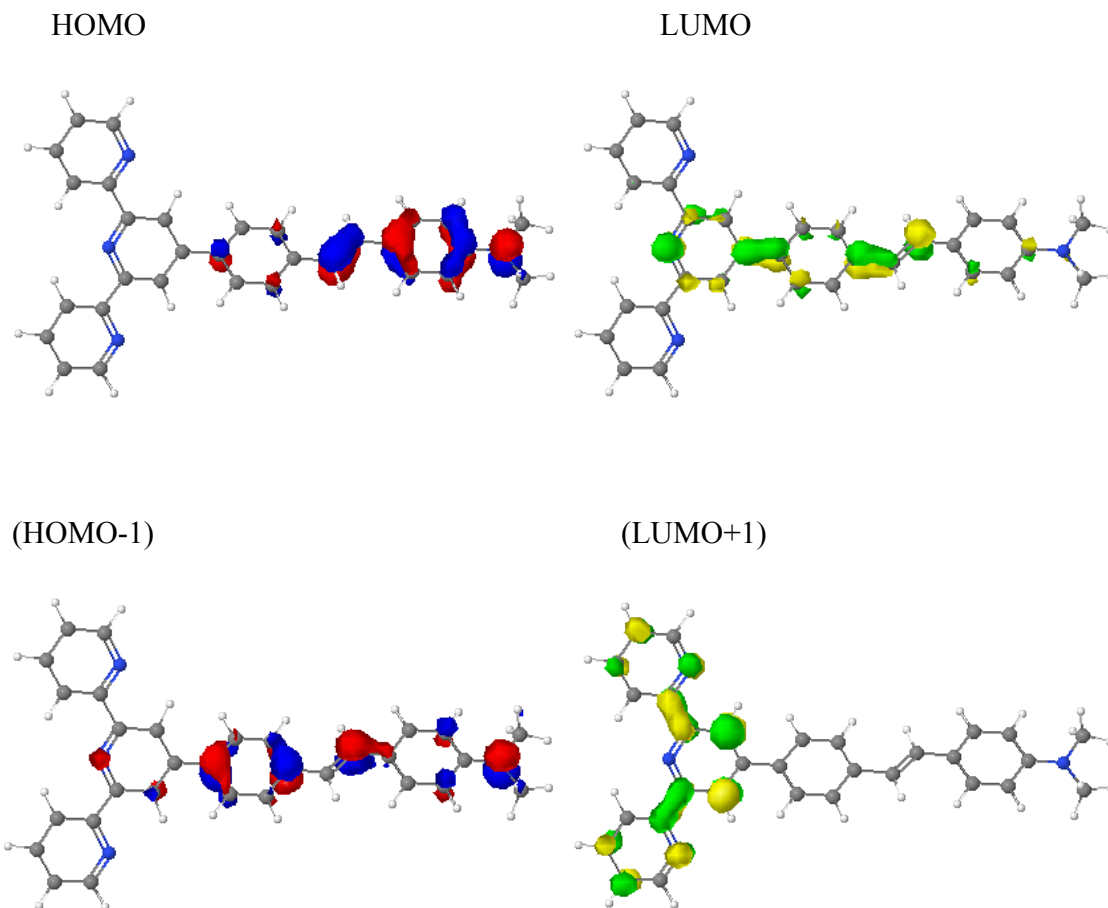

IN MNpvpt the HOMO is mostly localized on the dimethylaminonitrogen phenyl moiety and the LUMO is mostly localized on the terpyridine moiety. Upon protonation of the diemthylaminonitrogen as in HMNpvpt (shown below) the HOMO is localized on the terpyridine moiety and the LUMO is localized on the dimethylaminonitrogen phenyl moiety.

(b) **HMNpvpt**

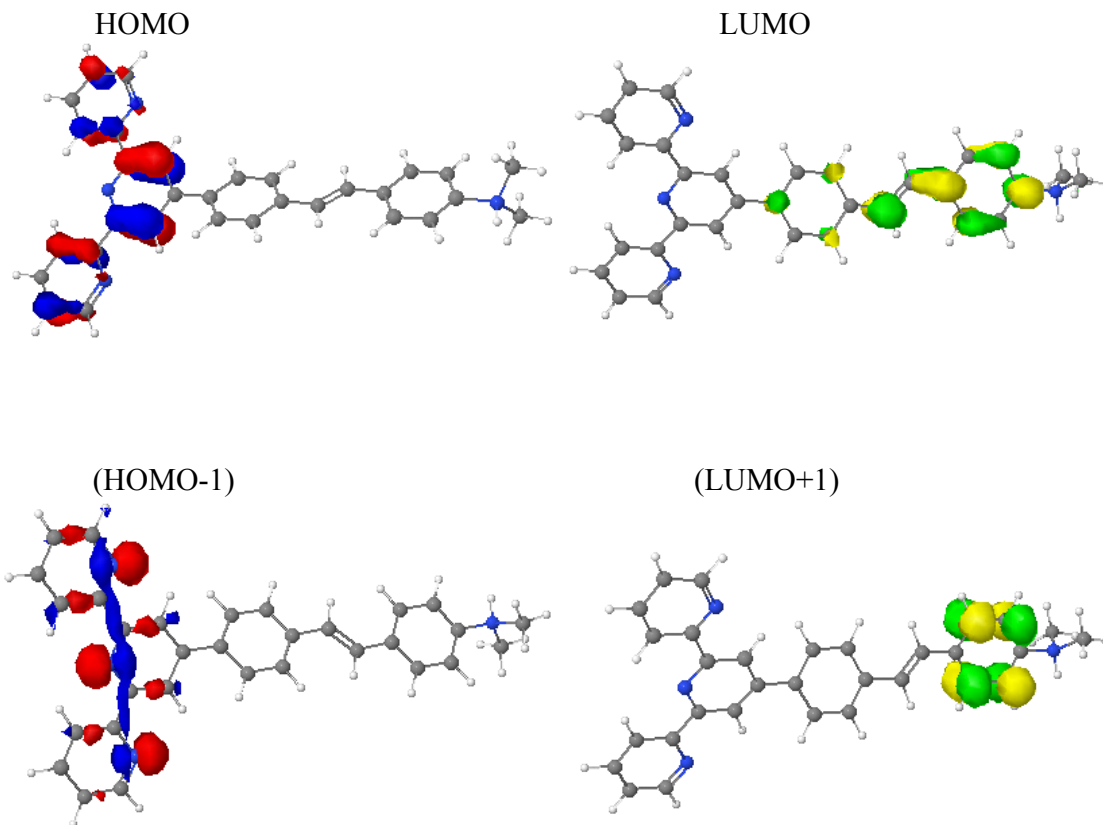

Gaussian 03, Revision D.02,  
M. J. Frisch, G. W. Trucks, H. B. Schlegel, G. E. Scuseria,  
M. A. Robb, J. R. Cheeseman, J. A. Montgomery, Jr., T. Vreven,  
K. N. Kudin, J. C. Burant, J. M. Millam, S. S. Iyengar, J. Tomasi,  
V. Barone, B. Mennucci, M. Cossi, G. Scalmani, N. Rega,  
G. A. Petersson, H. Nakatsuji, M. Hada, M. Ehara, K. Toyota,  
R. Fukuda, J. Hasegawa, M. Ishida, T. Nakajima, Y. Honda, O. Kitao,  
H. Nakai, M. Klene, X. Li, J. E. Knox, H. P. Hratchian, J. B. Cross,  
V. Bakken, C. Adamo, J. Jaramillo, R. Gomperts, R. E. Stratmann,  
O. Yazyev, A. J. Austin, R. Cammi, C. Pomelli, J. W. Ochterski,  
P. Y. Ayala, K. Morokuma, G. A. Voth, P. Salvador, J. J. Dannenberg,  
V. G. Zakrzewski, S. Dapprich, A. D. Daniels, M. C. Strain,  
O. Farkas, D. K. Malick, A. D. Rabuck, K. Raghavachari,  
J. B. Foresman, J. V. Ortiz, Q. Cui, A. G. Baboul, S. Clifford,  
J. Cioslowski, B. B. Stefanov, G. Liu, A. Liashenko, P. Piskorz,  
I. Komaromi, R. L. Martin, D. J. Fox, T. Keith, M. A. Al-Laham,  
C. Y. Peng, A. Nanayakkara, M. Challacombe, P. M. W. Gill,  
B. Johnson, W. Chen, M. W. Wong, C. Gonzalez, and J. A. Pople,  
Gaussian, Inc., Wallingford CT, 2004.
